# Supplementary material for: Organic photodetectors with high detectivity for broadband detection covering UV-vis-NIR
Source: Royal Society of Chemistry journal article supplement (doi:10.1039/d2tc00525e), 2022-01-01
Supplement: d2tc00525e1.pdf [file d2tc00525e1.pdf]

Supporting Information

**Organic Photodetectors with High Detectivity for Broadband  
Detection Covering UV-Vis-NIR**

*Congdi Xu<sup>a</sup>, Peng Liu<sup>a</sup>, Chuang Feng<sup>a</sup>, Zhicai He<sup>a,b\*</sup>, Yong Cao<sup>a</sup>*

a, Institute of Polymer Optoelectronic Materials and Devices, State Key Laboratory of Luminescent

Materials and Devices, South China University of Technology, Guangzhou 510640, China

b, Department of Physics, Imperial College London, London SW7 2BW, U.K

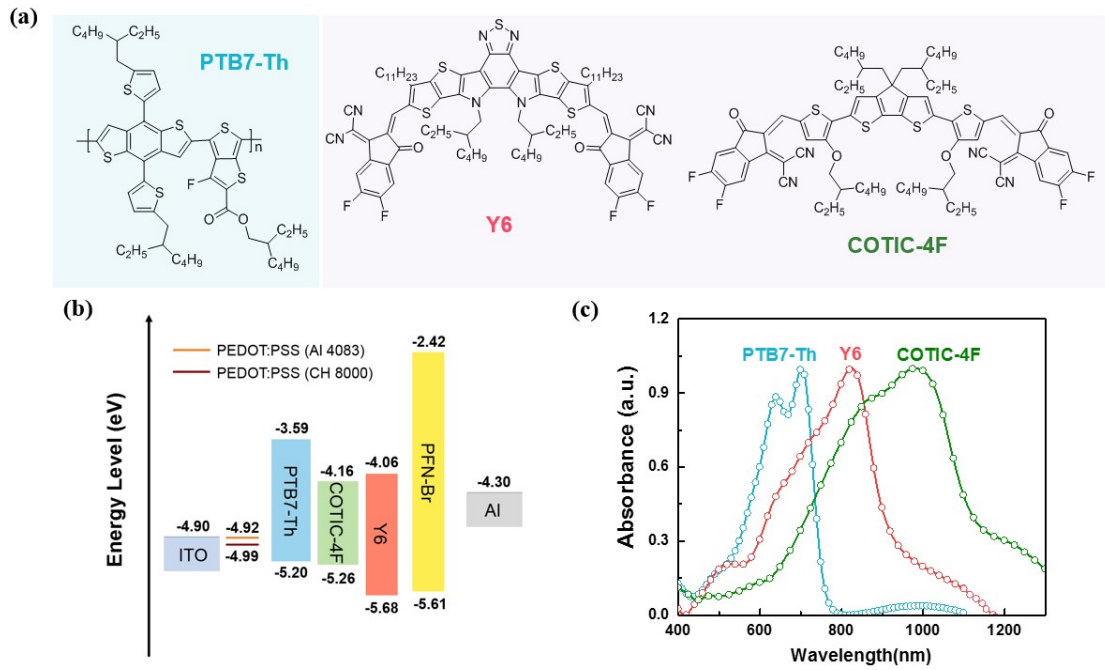

**Fig. S1** (a) Chemical structures of the active layer materials: PBT7-Th, Y6 and COTIC-4F. (b) The energy level diagram of the materials employed in this work. (c) UV-Vis absorption spectra of the active layer materials as films.

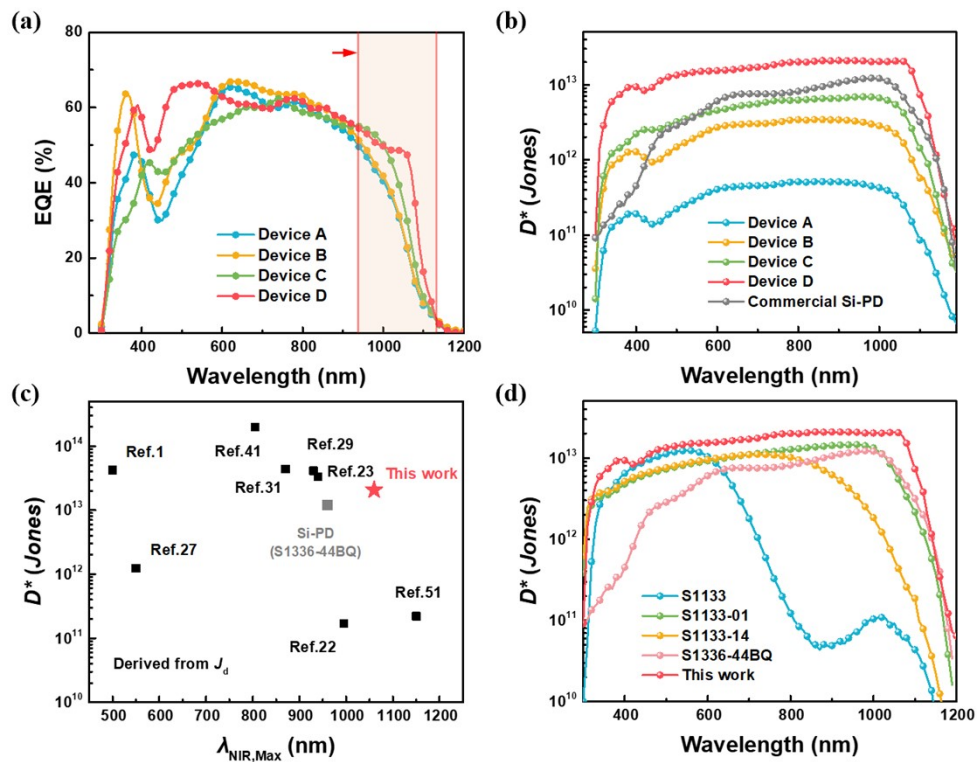

**Fig. S2** (a) EQE profile (at -0.1 V) of devices with different architecture (the selected orange bar shows the wavelength region where the EQE spectrum has been gradually expanded after optimization). (b) The specific detectivity ( $D^*$ ) of OPDs derived from the  $J_d$  at -0.1 V. The gray curve represents the commercial Si PDs (Hamamatsu S1336-44BQ). (c) Shot-noise-limited specific detectivity ( $D^*$ ) as function of maximum wavelength at NIR region ( $\lambda_{\text{NIR,Max}}$ ) accomplished in this work in comparison to previously reported OPDs and the commercial photodetectors with the same calculation method (see also Table S1). (d) Specific detectivity ( $D^*$ ) obtained from  $J_d$  of the optimal OPD in this work and four commercial Si PDs (Hamamatsu S1133, S1133-01, S1133-14, and S1336-44BQ).

**Table S1.** Performance parameters of peer OPDs, the optimal devices in this work and commercial Si PDs.

| Active layer              | Spectra region (nm) | Bias (V) | EQE (%)                | R (A/W)         | $D^*$ (Jones)                                                         | LDR (dB) | $f_{3\text{dB}}$ (kHz) | Ref. |
|---------------------------|---------------------|----------|------------------------|-----------------|-----------------------------------------------------------------------|----------|------------------------|------|
| PDDTT:PC <sub>60</sub> BM | 300-1450            | -0.1     | 26%                    | 0.17            | $4.2 \times 10^{13 \text{ a}}$<br>@500 nm                             | >100     | NA                     | [1]  |
| PM6:O4TFIC                | 400-1100            | 0        | NA                     | 0.50<br>@890 nm | $9.0 \times 10^{11 \text{ b}}$<br>@915 nm                             | NA       | >50                    | [17] |
| PBDTTT-C-T:FOIC           | 300-1000            | -1       | 55%<br>@730 nm         | 0.30<br>@900 nm | $2.1 \times 10^{13 \text{ b}}$<br>@860 nm                             | 106      | 30                     | [18] |
| PTB7-Th:<br>COTIC-4F      | 300-1100            | 0        | 51%<br>@960 nm         | 0.37<br>@950 nm | $1.7 \times 10^{11 \text{ a}}$<br>@995 nm                             | NA       | NA                     | [22] |
| PTB7-Th:<br>CO1-4Cl       | 400-1100            | -0.1     | 60-68% @<br>750-940 nm | 0.45<br>@940 nm | $3.31 \times 10^{13 \text{ a}}$ /<br>> $10^{12 \text{ b}}$<br>@940 nm | 126      | 240                    | [23] |

|                                 |          |      |                       |                  |                                                                 |      |       |      |
|---------------------------------|----------|------|-----------------------|------------------|-----------------------------------------------------------------|------|-------|------|
| P3HT:PC <sub>71</sub> BM        | 300-700  | -0.5 | 68.6%<br>@545 nm      | 0.302<br>@550 nm | 1.23×10 <sup>12 a)</sup><br>@505 nm                             | NA   | NA    | [27] |
| PTB7-Th:                        |          |      | >65% @                | 0.54             | 5.1×10 <sup>13 a)</sup>                                         |      |       |      |
|                                 | 300-1000 | -0.1 |                       |                  | 4.6×10 <sup>13 b)</sup>                                         | 157  | 4.5   | [29] |
| IEICO-4F                        |          |      | 580-930 nm<br>@930 nm | @930 nm          | @930 nm                                                         |      |       |      |
| NT40:                           |          |      | 57.2%                 | 0.40             | 4.4×10 <sup>13 a)</sup>                                         |      |       |      |
|                                 | 300-1000 | -0.1 |                       |                  | 7.5×10 <sup>12 b)</sup>                                         | 123  | >100  | [31] |
| IEICO-4F                        |          |      | @870 nm               | @870 nm          | @870 nm                                                         |      |       |      |
| PTB7-Th:                        |          |      |                       | 0.35             | 5.6×10 <sup>11 b)</sup>                                         |      |       |      |
| CO <sub>8</sub> DFIC:           | 300-1000 | 0    | NA                    | @670 nm          | @670 nm                                                         | 135  | ~2    | [32] |
| PC <sub>71</sub> BM             |          |      |                       |                  |                                                                 |      |       |      |
| PTB7-Th:                        |          |      | >40%                  | 0.35             | 5×10 <sup>12 b)</sup>                                           |      |       |      |
| COTIC-                          | 300-1200 | -0.1 | @1070 nm              | @1070 nm         | @1070 nm                                                        | >120 | >1000 | [34] |
| 4Cl:PCBM                        |          |      |                       |                  |                                                                 |      |       |      |
| D18:Y6                          | 300-1000 | 0    | >80%<br>@805 nm       | 0.499<br>@805 nm | 1.97×10 <sup>14 a)</sup><br>1.14×10 <sup>13 b)</sup><br>@805 nm | 83   | NA    | [41] |
| CPDT-TQ: P <sub>71</sub> BM     | 600-1550 | 0    | 8%<br>@1190 nm        | NA               | 5×10 <sup>10 b)</sup><br>@1190 nm                               | NA   | NA    | [43] |
| P1:P <sub>71</sub> BM (no gain) | 300-1540 | -0.1 | 7.8%<br>@1200 nm      | 0.08<br>@1150 nm | 2.2×10 <sup>11 a)</sup><br>@1150 nm                             | NA   | NA    | [51] |

|                 |          |      |         |          |                          |      |    |            |
|-----------------|----------|------|---------|----------|--------------------------|------|----|------------|
| PFT-OEHp:Y6     | 300-1000 | -0.1 | ~80%    | 0.5      | 1.16×10 <sup>13</sup> b) | >135 | 50 | [65]       |
|                 |          |      |         | @800 nm  | @800 nm                  |      |    |            |
| PTB7-Th:        |          |      | 62.4%   | 0.41     | 2.1×10 <sup>13</sup> a)/ |      |    |            |
| COTIC-4F:Y6     | 300-1200 | -0.1 | @780 nm | @1060 nm | 6.9×10 <sup>12</sup> b)  | 102  | 45 | This work  |
|                 |          |      |         |          | @1060 nm                 |      |    |            |
| Si (S1336-44BQ) | 300-1100 | -0.1 | 72.8%   | 0.57     | 1.2×10 <sup>13</sup>     | NA   | NA | Commercial |
|                 |          |      | @960 nm | @960 nm  | @960 nm                  |      |    |            |

a) The shot-noise-limited specific detectivity is calculated by the equation of

$$D^* = \frac{R}{\sqrt{2qJ_d}} \quad \text{b) The specific detectivity are obtained by the equation of} \quad D^* = \frac{R\sqrt{A}}{S_n}$$

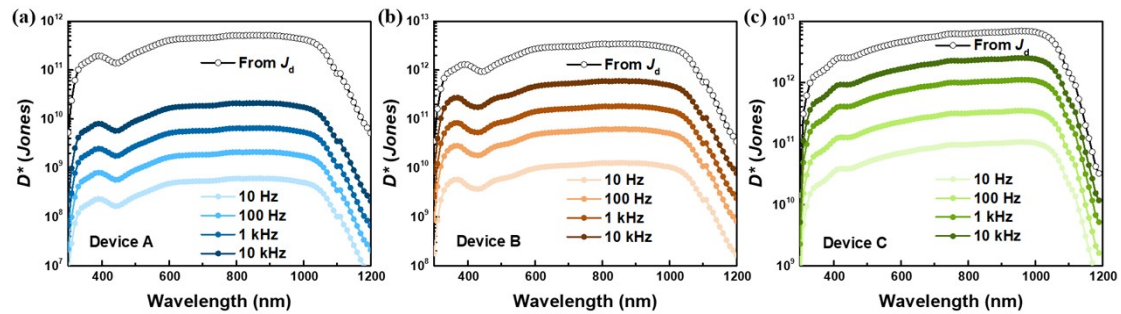

**Fig. S3** The specific detectivity ( $D^*$ ) obtained by the equation of  $D^* = \frac{R\sqrt{A}}{S_n}$  at the frequency of 10,100,1000,0000 Hz, respectively.

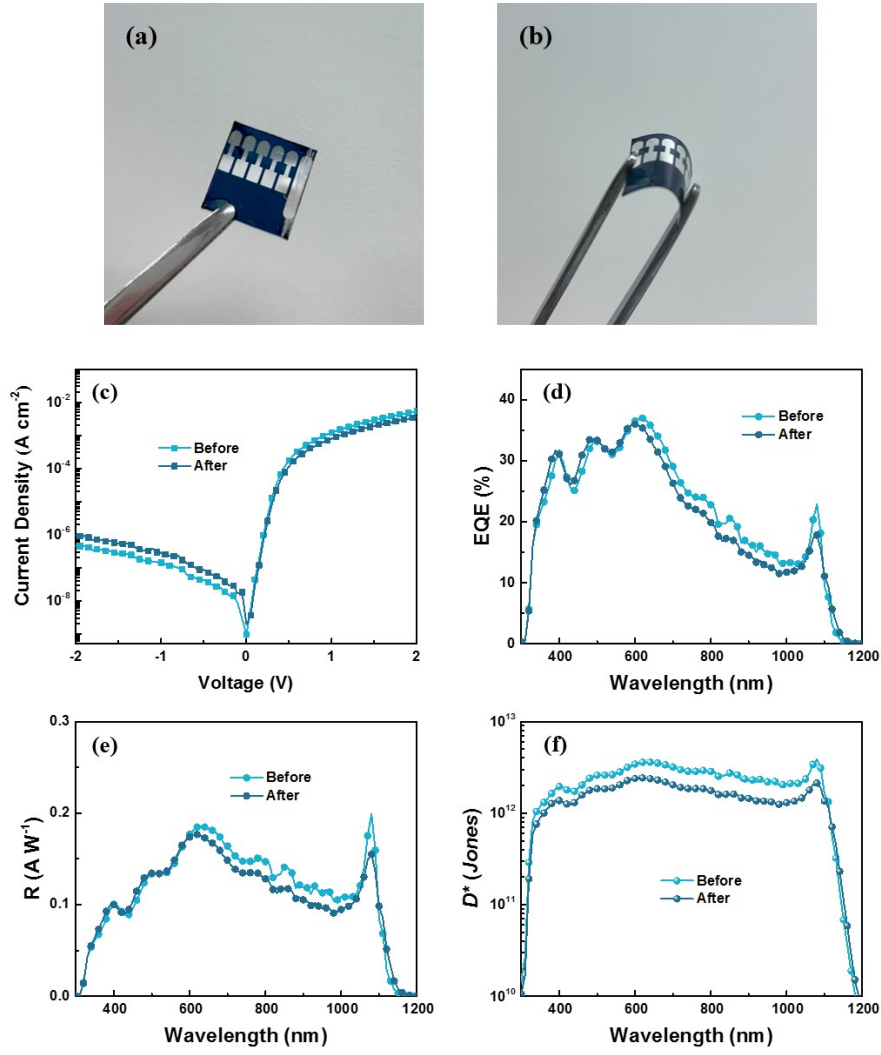

**Fig. S4** (a-b) The picture and the characteristics of flexible device before and after bending. (c-f) device performance of the flexible device before and after bending.

**Table S2.** Performance parameters of flexible OPDs before and after bending.

| Flexible OPDs  | $J_d @ -0.1 \text{ V}$<br>( $\text{A}/\text{cm}^2$ ) | Rectification ratios<br>( $\pm 2 \text{ V}$ ) | EQE<br>(%) | R<br>( $\text{A}/\text{W}$ ) | $D^*_{\text{max}}$<br>(Jones) |
|----------------|------------------------------------------------------|-----------------------------------------------|------------|------------------------------|-------------------------------|
| Before bending | $8.3 \times 10^{-9}$                                 | $1.2 \times 10^4$                             | 22.8       | 0.20                         | $3.9 \times 10^{12}$          |
| After bending  | $2.1 \times 10^{-8}$                                 | $3.9 \times 10^3$                             | 17.8       | 0.16                         | $2.0 \times 10^{12}$          |

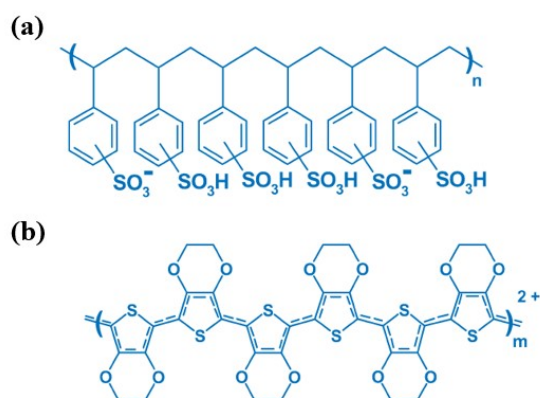

**Fig. S5** Chemical structures of the (a) PSS<sup>-</sup> and (b) PEDOT<sup>+</sup> chains.<sup>[1]</sup>

**Table S3.** Parameters of two kinds of PEDOT:PSS.

| Typical Property or<br>Characteristic | pH at 20° C | PEDOT <sup>+</sup> /PSS <sup>-</sup> ratio | Resistivity (Ohm/cm)                  | Mean WF (mV) |
|---------------------------------------|-------------|--------------------------------------------|---------------------------------------|--------------|
| Al 4083                               | 1.7 – 2.3   | 1:6                                        | 500 – 5000                            | 525.3 mV     |
| CH 8000                               | 1.2 – 1.8   | 1:20                                       | 1×10 <sup>5</sup> – 3×10 <sup>5</sup> | 591.8 mV     |
| ITO                                   | /           | /                                          | /                                     | 506.2 mV     |

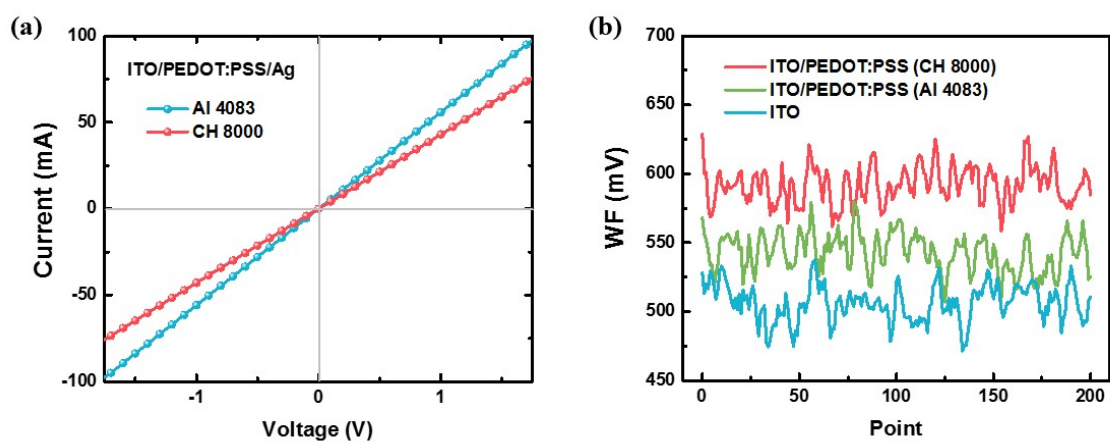

**Fig. S6** (a) Current-Voltage curve of ITO/Interlayer/Ag devices. (b) Work function diagram of film location points measured by SKPM.

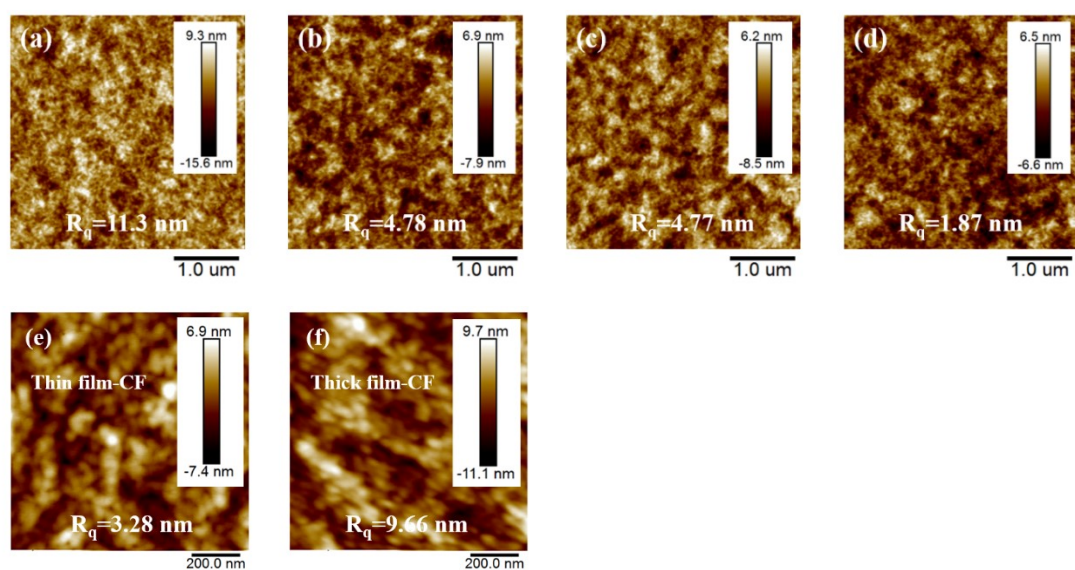

**Fig. S7** The AFM height images of the films, (a) PEDOT:PSS (A14083) /PTB7-Th:COTIC-4F (120 nm), (b) PEDOT:PSS (CH8000) /PTB7-Th:COTIC-4F (120 nm), (c,e) PEDOT:PSS (CH8000) /PTB7-Th:COTIC-4F:Y6 (120 nm) and (d,f) PEDOT:PSS (CH8000) /PTB7-Th:COTIC-4F:Y6 (300 nm). The active layers (PTB7-Th:COTIC-4F:Y6) of (e) and (f) use chloroform as solvent, others use chlorobenzene as solvent.

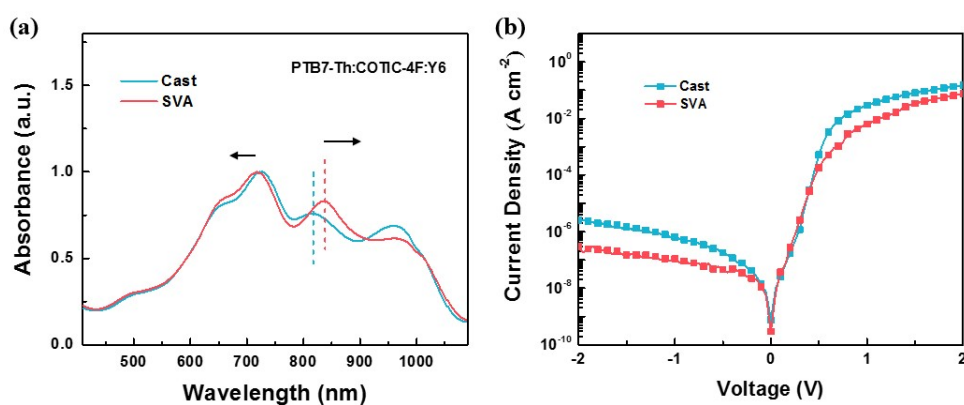

**Fig. S8** The absorption spectra of the ternary films and the  $J_d$ - $V$  curve of the devices derived from the films before and after solvent vapor annealing.



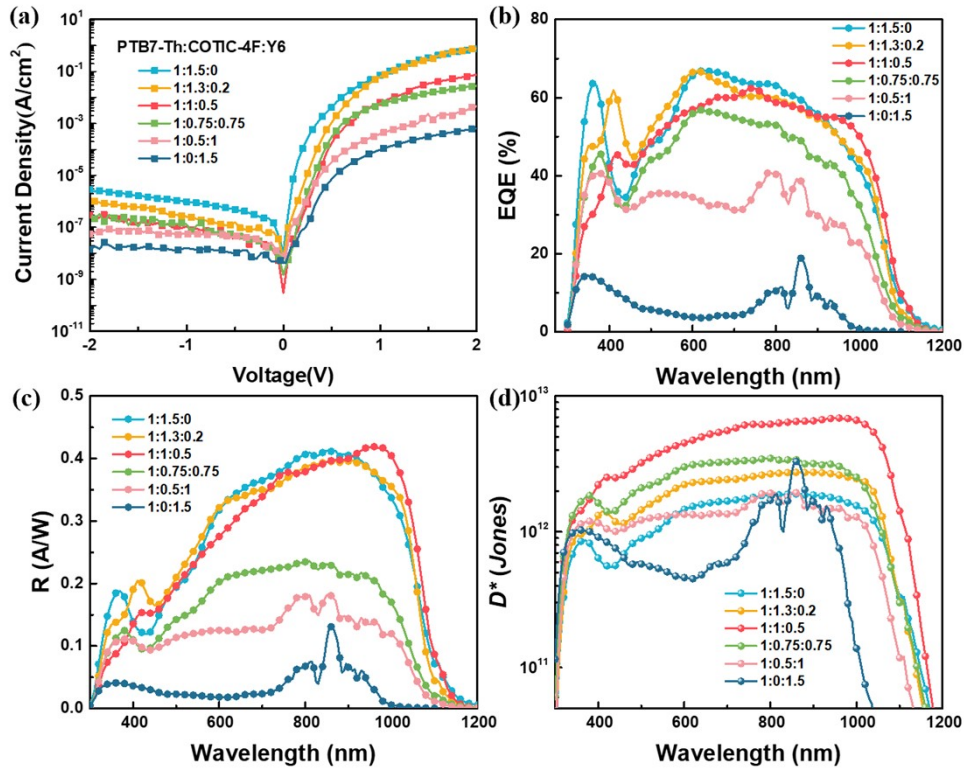

**Fig. S9** The performance of the devices with different proportions of PTB7-Th:COTIC-4F:Y6 (wt:wt).

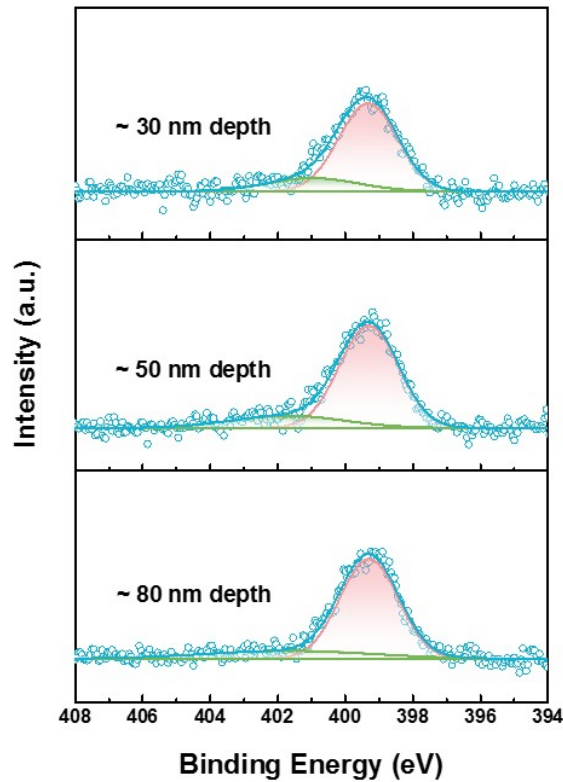

**Fig. S10** The XPS profile of N 1s spectrum of ternary blend film (PTB7-Th:COTIC-4F:Y6) at different etching depths. The peaks in green could be produced by Y6.

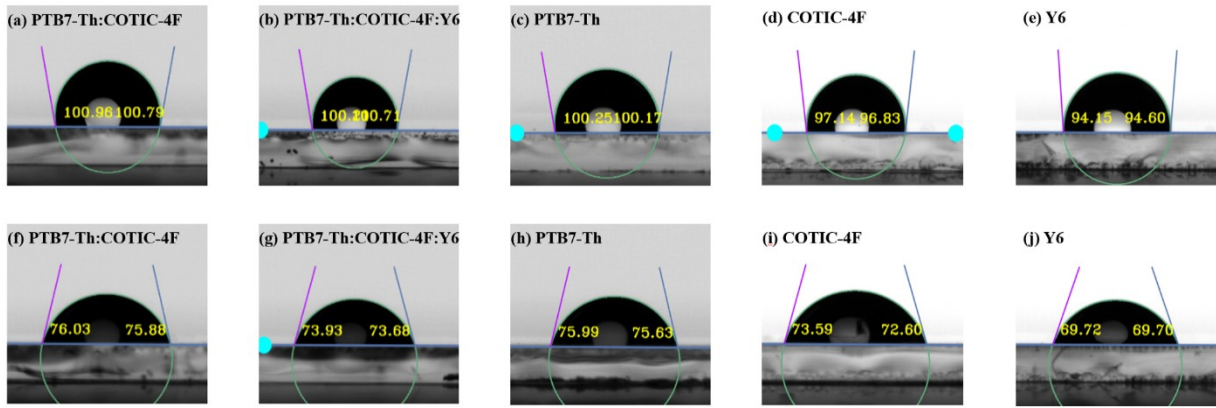

**Fig. S11** Views of surface contact angle measurements with the blend and pure films. The measurements are carried out by using deionized water (a-e) and diiodomethane (f-j) as the wetting liquid.

**Table S4.** The Parameters of the films obtained from contact angle measurement

| Film                    | <sup>a)</sup><br>$\gamma$<br>(mN·m <sup>-1</sup> ) | $\gamma^d$<br>(mN·m <sup>-1</sup> ) | $\gamma_p$ (mN·m <sup>-1</sup> ) | $\theta_{\text{wat}}$ (°) | $\theta_{\text{oil}}$ (°) | $\delta$ (MPa <sup>1/2</sup> ) | $\Delta\delta^b$ (MPa <sup>1/2</sup> ) |
|-------------------------|----------------------------------------------------|-------------------------------------|----------------------------------|---------------------------|---------------------------|--------------------------------|----------------------------------------|
| PTB7-Th:<br>COTIC-4F    | 16.82                                              | 13.84                               | 2.98                             | 100.88                    | 75.96                     | /                              | /                                      |
| PTB7-Th:<br>COTIC-4F:Y6 | 17.76                                              | 15.10                               | 2.66                             | 100.46                    | 73.81                     | /                              | /                                      |
| PTB7-Th                 | 16.53                                              | 13.24                               | 3.29                             | 100.31                    | 75.81                     | 14.91                          | /                                      |
| COTIC-4F                | 18.32                                              | 14.31                               | 4.02                             | 96.99                     | 73.01                     | 15.70                          | 0.79                                   |
| Y6                      | 20.01                                              | 15.42                               | 4.58                             | 94.38                     | 69.71                     | 16.41                          | 1.49                                   |

a) Calculated by Owens-Wendt-Rabel-Kaelble (OWRK) method

b)  $\Delta\delta = |\delta_{\text{donor}} - \delta_{\text{acceptor}}|$

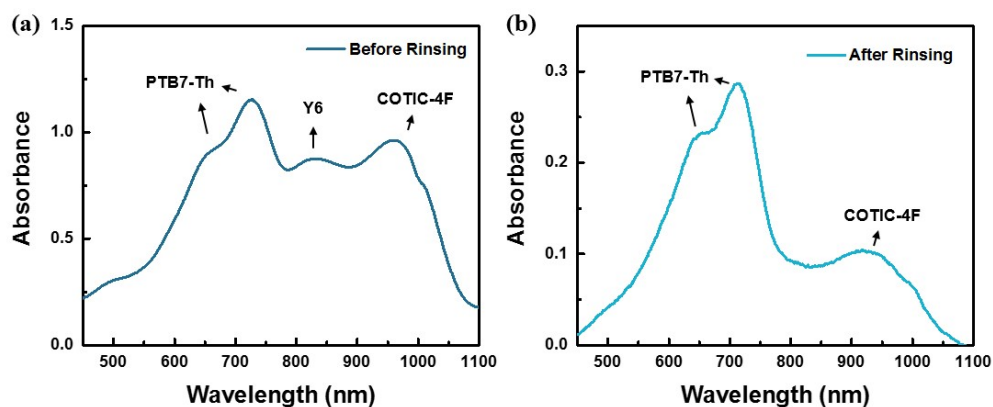

**Fig. S12** The absorption spectra of the film (active layer) before and after solvent rinsing. It can be seen from the spectrum that Y6 is almost completely washed away, which proves that Y6 is mainly concentrated on the surface.

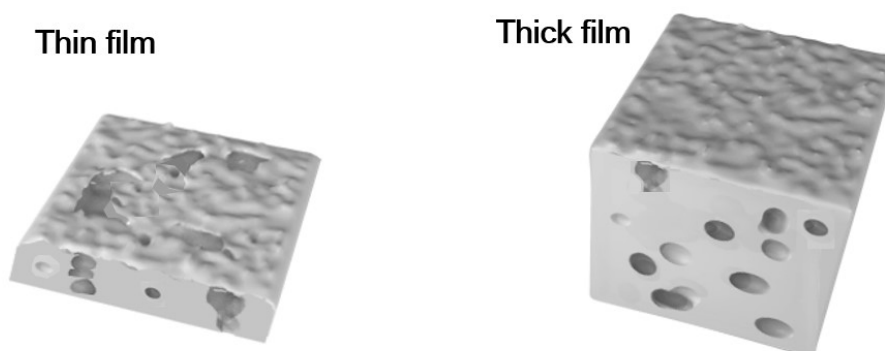

**Fig. S13** The schematic diagram of pathways formed inside the thin film and thick film.

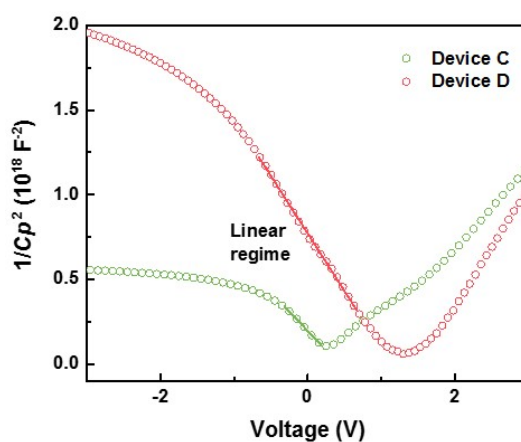

**Fig. S14** The  $1/Cp^2$ -V characteristics of devices measured at a frequency of 1 kHz.

**Table S5.** The results of Mott-Schottky analysis of the OPDs with different thickness.

| Thickness of devices | The charge doping density ( $N$ )     |
|----------------------|---------------------------------------|
| 120 nm               | $3.20 \times 10^{16} \text{ cm}^{-3}$ |
| 300 nm               | $2.15 \times 10^{16} \text{ cm}^{-3}$ |

The relative permittivity of organic material is set to be 3.

The temperature-dependent dark current measurements were carried out to verify the surface trap state features by studying the activation energy ( $E_a$ ) from the slope of Arrhenius plots (Chinese Phys. B 29, 098801 (2020)) as shown in Figure S15. For the device with thin film, the dark current  $J_0$  shows 2 sets of Gaussian distributions, which may be attributed to the more complicated distribution of the surface trap states.

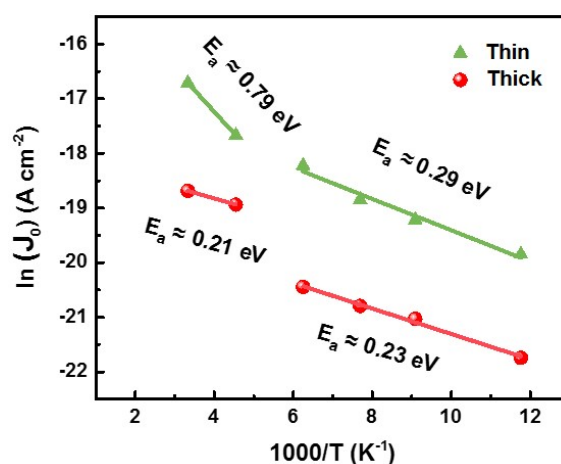

**Fig. S15** The surface trap Gaussian distributions of the device deduced from temperature-dependent dark current measurements.

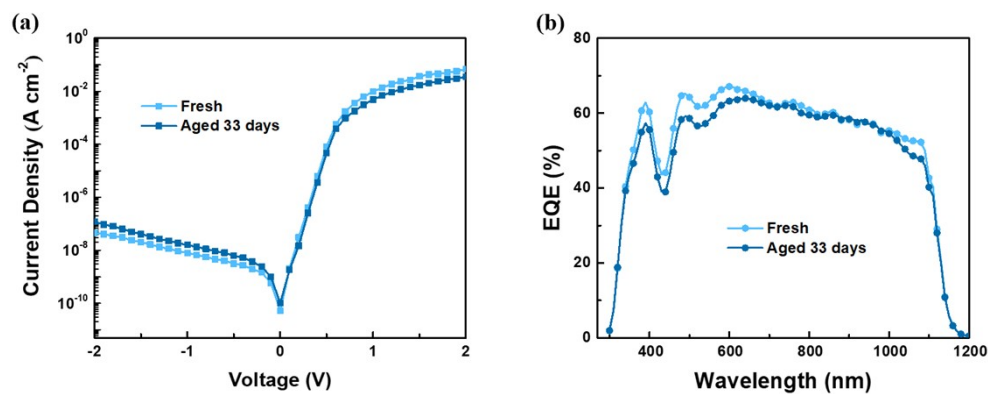

**Fig. S16** The Dark  $J$ - $V$  characteristics and EQE spectrum of optimized device before and after being stored in air for 33 days.

## References

- [1] [https://www.heraeus.com/media/media/hec/documents\\_hec/brochures\\_en/CLEVIOS\\_FL\\_Innovate.pdf](https://www.heraeus.com/media/media/hec/documents_hec/brochures_en/CLEVIOS_FL_Innovate.pdf) for “*CLEVIOS*<sup>TM</sup> PEDOT Conductive Polymers” (accessed: May 2021).
